# Supplementary material for: Using Local Ecological Knowledge to Search for Non-Native Species in Natura 2000 Sites in the Central Mediterranean Sea: An Approach to Identify New Arrivals and Hotspot Areas
Source: MDPI journal article supplement (doi:10.3390/biology12091158), 2023-08-23
Supplement: s1 [file s1]

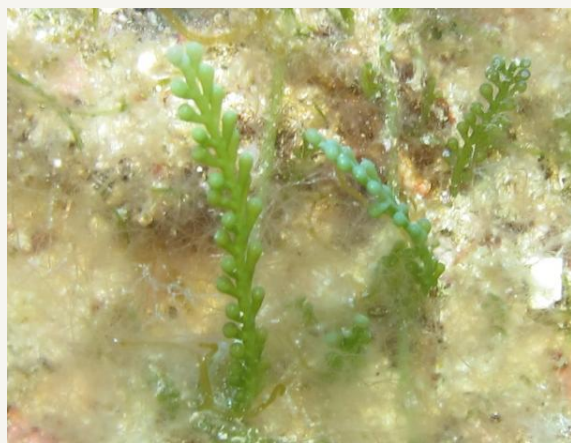

**1 *Caulerpa cylindracea***

Photo: Pierpaolo Consoli

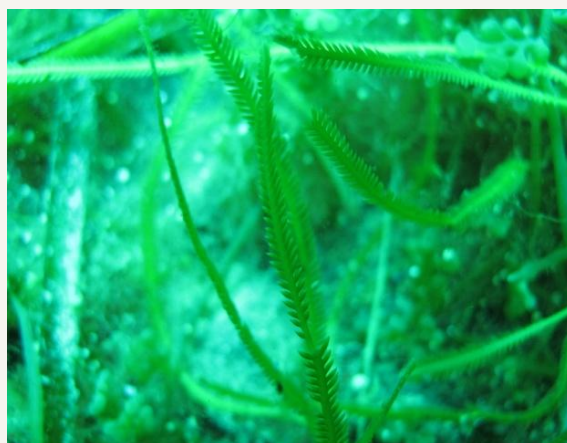

**2 *Caulerpa taxifolia***

Photo: Alan Deidun

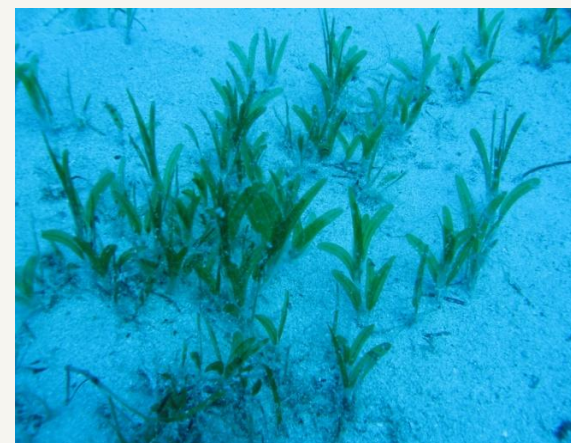

**3 *Halophila stipulacea***

Photo: Alan Deidun

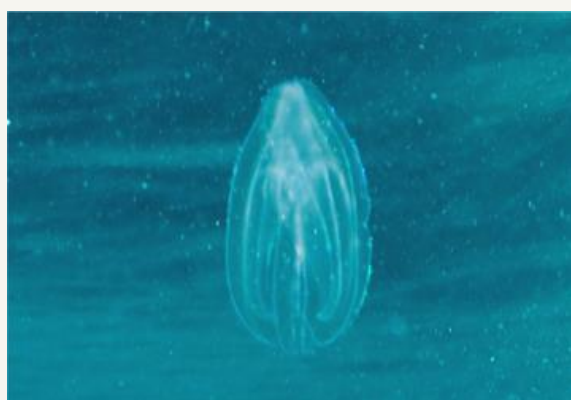

**4 *Mnemiopsis leidyi***

Photo: Luca Gagliardi

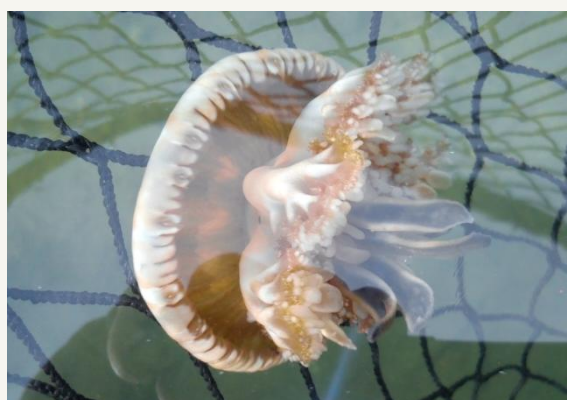

**5 *Cassiopea andromeda***

Photo: Luca Castriota

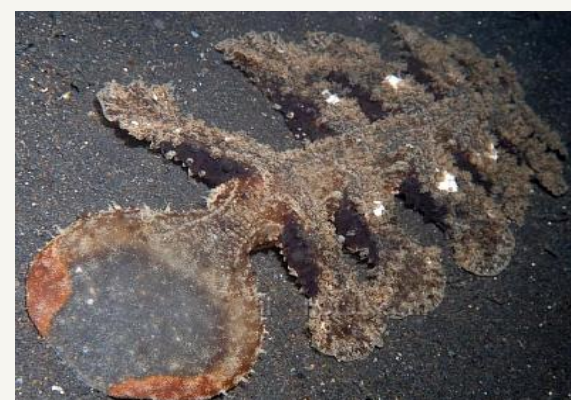

**6 *Melibe viridis***

Photo: Mark Atwell

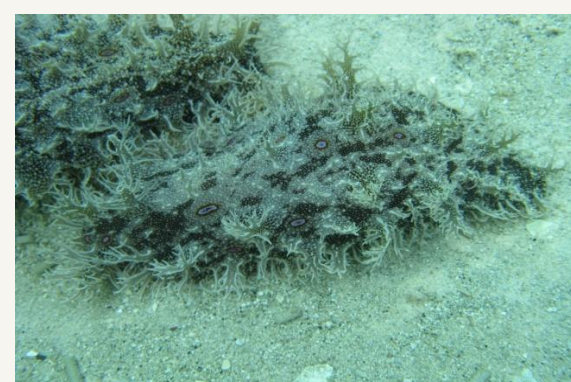

**7 *Bursatella leachii***

Photo by: Alan Deidun

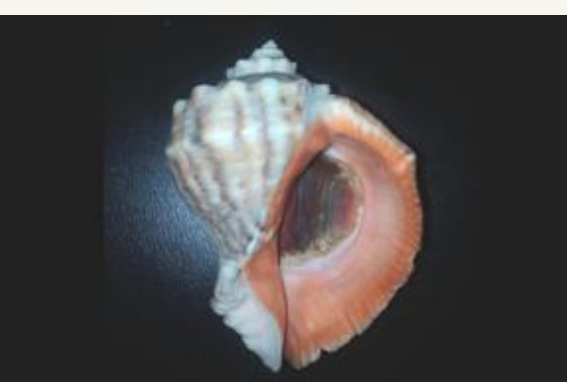

**8 *Rapana venosa***

Photo by: Franco Agamennone

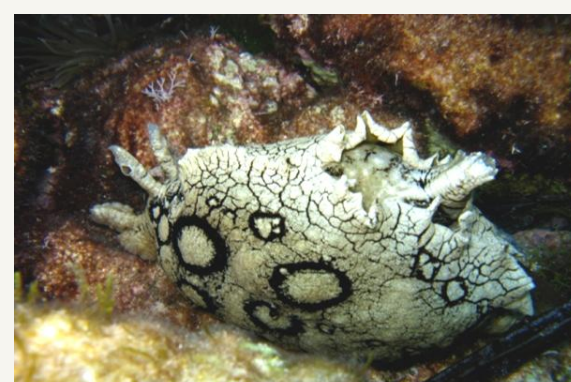

**9 *Aplysia dactylomela***

Photo: Bruno Zava

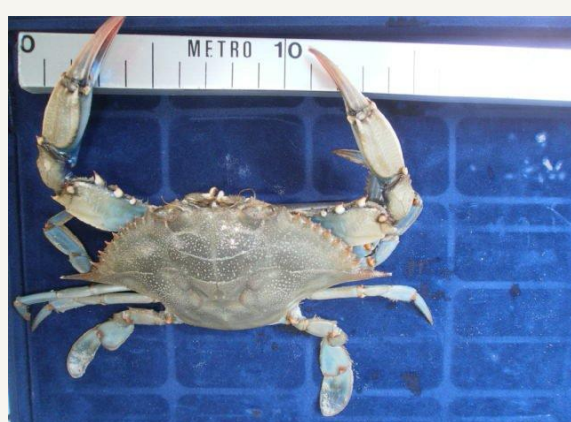

**10 *Callinectes sapidus***

Photo: Roberto Costantini

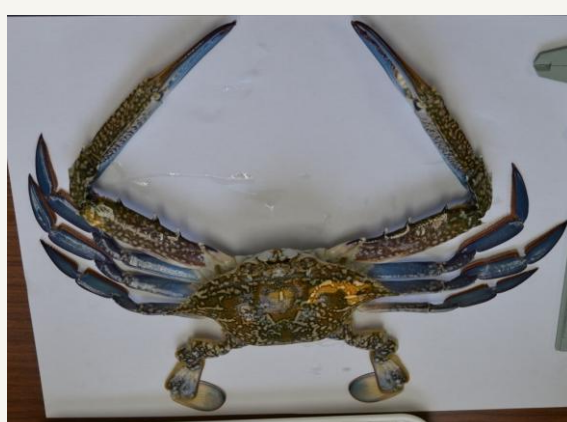

**11 *Portunus segnis***

Photo: Alan Deidun

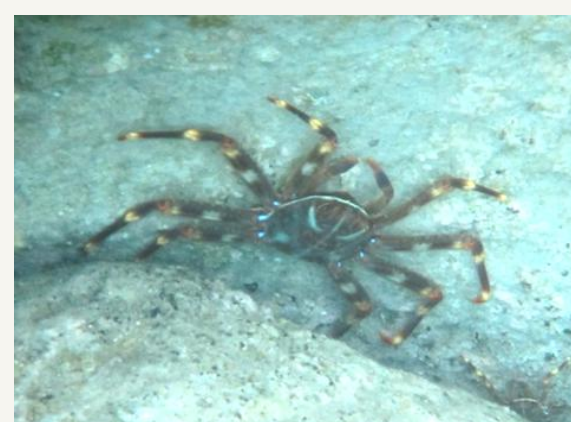

**12 *Percnon gibbesi***

Photo: Alan Deidun



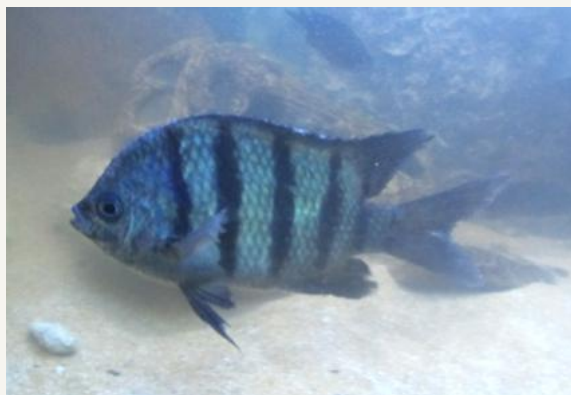

**13 *Abudefduf* sp**

Photo: Alan Deidun

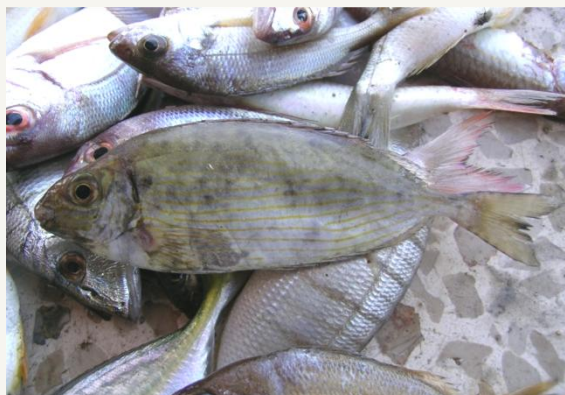

**14 *Siganus rivulatus***

Photo: Pierpaolo Consoli

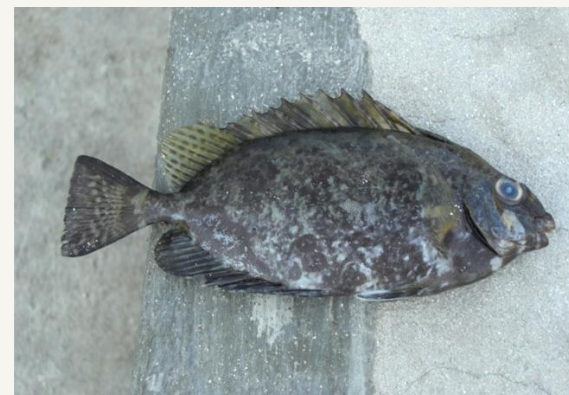

**15 *Siganus luridus***

Photo: Alan Deidun

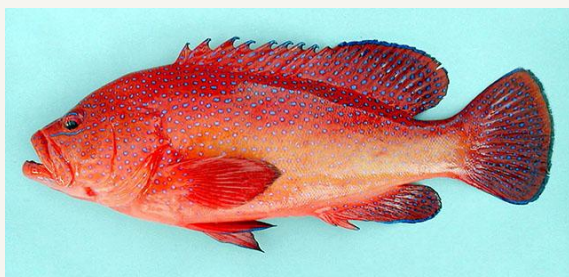

**16 *Cephalopholis taeniops***

Photo: Pedro Cambraia Duarte

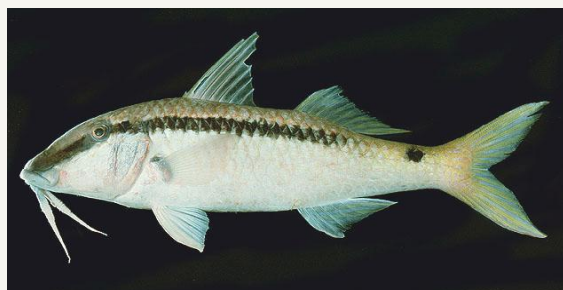

**17 *Parupeneus forsskali***

Photo: John E. Randall

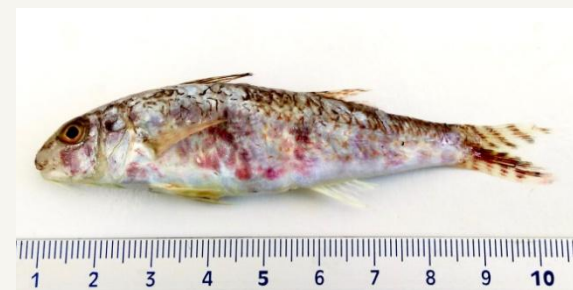

**18 *Upeneus pori***

Photo: Bruno Zava

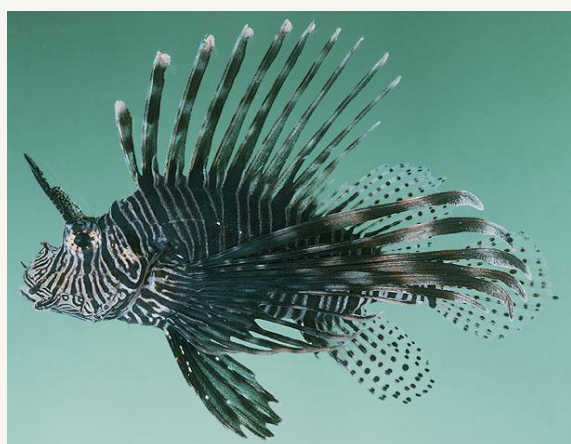

**19 *Pterois miles***

Photo: John E. Randall

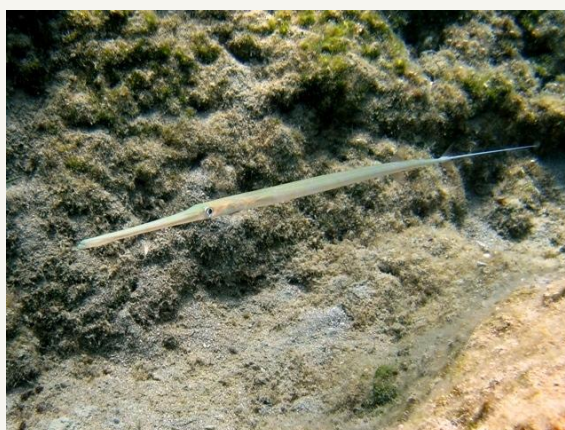

**20 *Fistularia commersonii***

Photo: Roberto Pillon

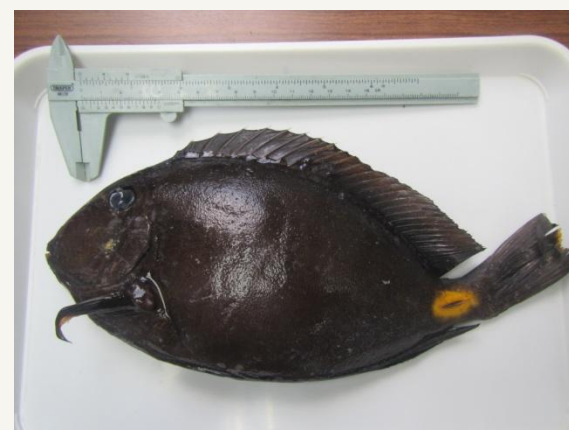

**21 *Acanthurus monroviae***

Photo: Alan Deidun

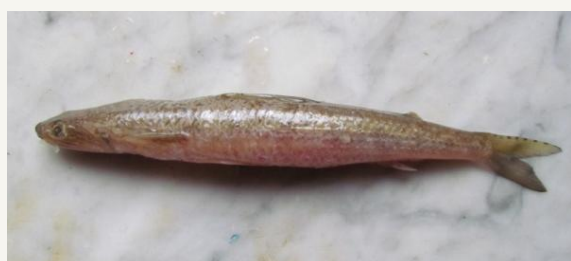

**22 *Saurida lessepsianus***

Photo: Pierpaolo Consoli

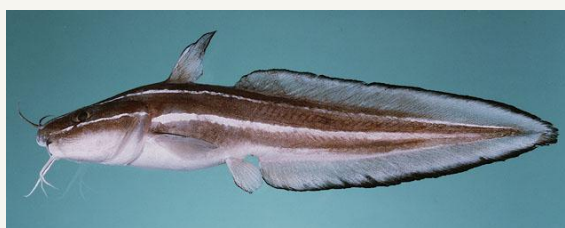

**23 *Plotosus lineatus***

Photo: John E. Randall

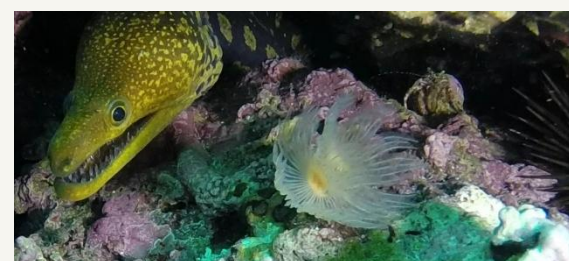

**24 *Enchelycore anatina***

Photo: Giuseppe Mazza
